# Supplementary figures and images for: Crystal structure of a hybrid salt–cocrystal and its resolution by preferential crystallization: ((±)trans-N,N′-dibenzyldiaminocyclohexane)(2,3-dichlorophenylacetic acid)4
Source: Royal Society of Chemistry journal article supplement (doi:10.1039/c1ce05484h), 2011-10-11

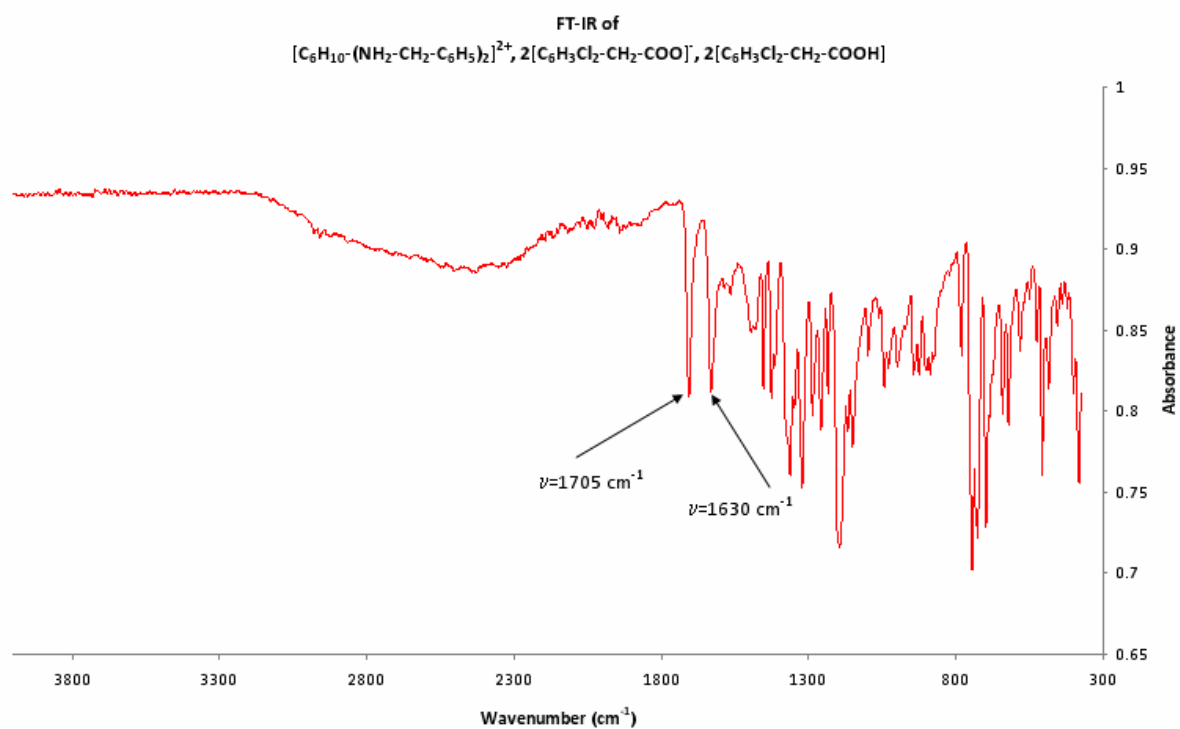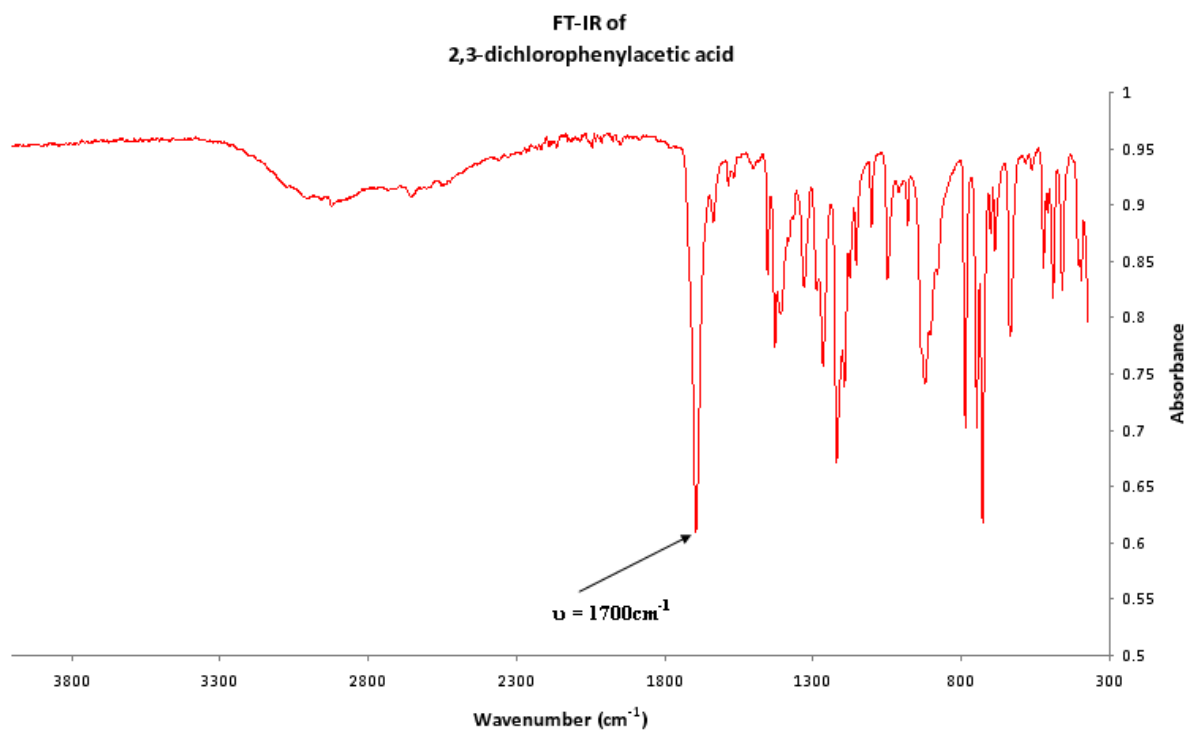

Supplement: c1ce05484h.pdf [file c1ce05484h.pdf]
